# Supplementary material for: Probabilistic flood inundation mapping through copula Bayesian multi-modeling of precipitation products
Source: Copernicus journal article supplement (doi:10.5194/nhess-24-2647-2024), 2024-08-02
Supplement: Supplementary file 1 [file nhess-24-2647-2024-supplement.pdf]

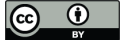

*Supplement of*

## **Probabilistic flood inundation mapping through copula Bayesian multi-modeling of precipitation products**

**Francisco Javier Gomez et al.**

*Correspondence to:* Francisco Javier Gomez (fjgomez1@crimson.ua.edu) and Hamid Moradkhani (hморadkhani@ua.edu)

The copyright of individual parts of the supplement might differ from the article licence.

Table S1. Summary of stations used for boundary conditions and validation.

| Gauge station name                     | Source     | ID station      | CoordX      | CoordY      |
|----------------------------------------|------------|-----------------|-------------|-------------|
| Galveston Entrance                     | NOAA       | 877134          | 333460.0534 | 3247507.171 |
| Eagle Point                            | NOAA       | 8771013         | 314383.5569 | 3262861.854 |
| Morgans Point                          | NOAA       | 8770613         | 308213.9904 | 3285397.388 |
| Clear Creek @ I-45                     | HCFWS      | ID113           | 294859.9137 | 3266188.535 |
| Horsepen Bayou @ Bay Area Boulevard    | HCFWS      | ID249           | 296314.0666 | 3274426.618 |
| Willow Spring Bayou @ Fairmont Parkway | HCFWS      | ID273           | 295758.8266 | 3281892.139 |
| Berry Bayou @ Forest Oaks Boulevard    | HCFWS      | ID323           | 282867.2778 | 3285058.503 |
| Manchester                             | NOAA       | 8770777         | 280846.6949 | 3290481.59  |
| Buffalo Bayou @ Turning Basin          | USGS/HCFWS | 08074710/ID2209 | 278217.2605 | 3292982.437 |
| Brays Bayou @ Lawndale Street          | HCFWS      | ID413           | 277062.1297 | 3290305.769 |
| Halls Bayou @ Airline Drive            | HCFWS      | ID1689          | 268555.2201 | 3309337.225 |
| Greens Bayou @ US 59                   | USGS/HCFWS | 08076000/ID1643 | 277390.6362 | 3311994.568 |
| Greens Bayou @ Mount Houston Parkway   | HCFWS      | ID1559          | 283859.7117 | 3308871.155 |
| Halls Bayou @ Tidwell Road             | HCFWS      | ID1674          | 279451.5829 | 3304233.431 |
| Carpenters Bayou @ I-10                | HCFWS      | ID1419          | 292367.3544 | 3295388.789 |
| Greens Bayou @ Normandy Street         | HCFWS      | ID1610          | 286737.0098 | 3295949.707 |
| Cedar Bayou @ SH 146                   | HCFWS      | ID1719          | 314722.7981 | 3294856.314 |
| Goose Creek @ Baker Road               | USGS/HCFWS | 08067525/ID1539 | 306651.8879 | 3295048.076 |
| Halls Bayou @ Jensen Drive             | HCFWS      | ID1679          | 274511.8023 | 3305751.408 |
| Carpenters Bayou @ US 90               | HCFWS      | ID1459          | 291272.2179 | 3302790.149 |
| Little Vince Bayou @ Jackson Avenue    | HCFWS      | ID943           | 287136.3213 | 3288185.133 |
| Big Island Slough @ Fairmont Parkway   | HCFWS      | ID233           | 299087.3324 | 3281944.932 |
| Armand Bayou @ GenoaRed Road           | HCFWS      | ID223           | 295336.8561 | 3280063.741 |
| Carpenters Bayou @ Waillisville Road   | HCFWS      | ID1443          | 291395.3891 | 3299651.95  |
| Hunting Bayou @ I-10                   | HCFWS      | ID823           | 284630.9719 | 3295540.868 |
| Hunting Bayou @ Loop 610               | HCFWS      | ID829           | 280787.8913 | 3298034.571 |
| Hunting Bayou @ Lockwood Drive         | HCFWS      | ID839           | 276693.456  | 3299813.897 |
| Little Vince Bayou @ Burke Road        | HCFWS      | ID239           | 288723.8638 | 3285723.538 |
| Vince Bayou @ West Ellaine Avenue      | HCFWS      | ID919           | 285564.071  | 3286980.312 |
| San Jacinto River near Sheldon         | HCFWS      | ID719           | 297695.1234 | 3306926.516 |

Coordinates X and Y are in UTM 15N

Table S2. Summary of AIC and xv-CIC calculations for copula selection

| Precipitation Product | Transitional cluster |                  |                | Upper cluster   |                 |                | Coastal cluster  |                 |               |
|-----------------------|----------------------|------------------|----------------|-----------------|-----------------|----------------|------------------|-----------------|---------------|
|                       | Copula               | AIC              | xv-CIC         | Copula          | AIC             | xv-CIC         | Copula           | AIC             | xv-CIC        |
| CMORPH                | Frank                | -15418.73        | 7712.99        | Frank           | -5511.80        | 2746.93        | Frank            | -1036.32        | 565.18        |
|                       | <b>Gumbel</b>        | <b>-16869.39</b> | <b>8381.99</b> | <b>Gumbel</b>   | <b>-5587.73</b> | <b>2775.68</b> | Gumbel           | -1081.66        | 528.54        |
|                       | Clayton              | -9638.16         | 1495.16        | Clayton         | -4303.88        | 1496.02        | Clayton          | -948.32         | 241.73        |
|                       | Gaussian             | -14612.51        | 7283.04        | Gaussian        | -5516.04        | 2743.30        | Gaussian         | -1180.03        | 583.68        |
|                       | t-Student            | -14985.4         | 7542.58        | t-Student       | -5434.09        | 2710.77        | <b>t-Student</b> | <b>-1203.27</b> | <b>590.23</b> |
| Daymet                | Frank                | -12108.17        | 6058.08        | Frank           | -4940.24        | 2466.08        | Frank            | -1060.82        | 576.87        |
|                       | <b>Gumbel</b>        | <b>-14005.23</b> | <b>6957.23</b> | <b>Gumbel</b>   | <b>-5156.39</b> | <b>2560.01</b> | Gumbel           | -1111.98        | 538.34        |
|                       | Clayton              | -7369.22         | 989.24         | Clayton         | -3996.15        | 1508.76        | Clayton          | -954.03         | 228.80        |
|                       | Gaussian             | -11866.77        | 5944.99        | Gaussian        | -5084.03        | 2530.97        | Gaussian         | -1198.18        | 590.08        |
|                       | t-Student            | -12145.55        | 6085.74        | t-Student       | -4988.44        | 2525.78        | <b>t-Student</b> | <b>-1228.36</b> | <b>607.39</b> |
| ERAS                  | Frank                | -15022.56        | 7508.60        | Frank           | -5556.28        | 2772.03        | Frank            | -980.94         | 537.85        |
|                       | <b>Gumbel</b>        | <b>-17052.40</b> | <b>8501.59</b> | Gumbel          | -5581.22        | 2763.49        | Gumbel           | -1035.40        | 507.12        |
|                       | Clayton              | -9029.39         | 740.86         | Clayton         | -4401.31        | 1455.72        | Clayton          | -934.19         | 263.16        |
|                       | Gaussian             | -14345.68        | 7178.26        | <b>Gaussian</b> | <b>-5663.71</b> | <b>2819.80</b> | Gaussian         | -1139.48        | 563.78        |
|                       | t-Student            | -12655.66        | 7252.86        | t-Student       | -5601.47        | 2805.90        | <b>t-Student</b> | <b>-1161.13</b> | <b>572.32</b> |
| IMERG                 | Frank                | -15738.77        | 7868.04        | Frank           | -5684.84        | 2840.02        | Frank            | -931.26         | 563.90        |
|                       | <b>Gumbel</b>        | <b>-17369.66</b> | <b>8648.35</b> | <b>Gumbel</b>   | <b>-5745.37</b> | <b>2846.66</b> | Gumbel           | -1076.38        | 523.49        |
|                       | Clayton              | -9353.34         | 781.37         | Clayton         | -4416.07        | 1520.69        | Clayton          | -945.89         | 246.91        |
|                       | Gaussian             | -14624.56        | 7320.27        | Gaussian        | -5669.30        | 2809.51        | Gaussian         | -1174.06        | 582.84        |
|                       | t-Student            | -14945.5         | 7481.88        | t-Student       | -5655.99        | 2787.60        | <b>t-Student</b> | <b>-1197.82</b> | <b>592.60</b> |
| NCEP Stage IV         | Frank                | -16158.52        | 8079.58        | Frank           | -5047.36        | 3124.47        | Frank            | -1160.38        | 577.64        |
|                       | <b>Gumbel</b>        | <b>-17654.66</b> | <b>8804.14</b> | <b>Gumbel</b>   | <b>-6417.06</b> | <b>3190.01</b> | Gumbel           | -1128.06        | 548.34        |
|                       | Clayton              | -9128.51         | 79.94          | Clayton         | -4497.60        | 1270.74        | Clayton          | -949.64         | 234.27        |
|                       | Gaussian             | -14560.65        | 7280.32        | Gaussian        | -6075.65        | 3011.95        | Gaussian         | -1211.56        | 598.97        |
|                       | t-Student            | -14900.45        | 7824.7         | t-Student       | -6151.63        | 3152.65        | <b>t-Student</b> | <b>-1236.59</b> | <b>611.10</b> |
| MRMS                  | Frank                | -16462.43        | 8233.20        | Frank           | -5778.04        | 3223.08        | Frank            | -1137.57        | 565.22        |
|                       | <b>Gumbel</b>        | <b>-17968.00</b> | <b>8971.62</b> | <b>Gumbel</b>   | <b>-6579.40</b> | <b>3277.06</b> | Gumbel           | -1099.25        | 535.10        |
|                       | Clayton              | -9131.78         | -293.65        | Clayton         | -4550.20        | 1173.84        | Clayton          | -944.94         | 251.00        |
|                       | Gaussian             | -14592.32        | 7305.32        | Gaussian        | -6181.27        | 3069.95        | Gaussian         | -1189.42        | 583.26        |
|                       | t-Student            | -14787.2         | 7824.78        | t-Student       | -6248.07        | 3104.09        | <b>t-Student</b> | <b>-1213.37</b> | <b>598.72</b> |
| NLDAS                 | Frank                | -16418.08        | 8069.31        | Frank           | -5879.33        | 3286.16        | Frank            | -1040.16        | 568.55        |
|                       | <b>Gumbel</b>        | <b>-17627.51</b> | <b>8786.11</b> | <b>Gumbel</b>   | <b>-6584.05</b> | <b>3291.19</b> | Gumbel           | -1098.19        | 539.15        |
|                       | Clayton              | -8897.18         | -302.44        | Clayton         | -4617.87        | 1126.77        | Clayton          | -948.94         | 226.81        |
|                       | Gaussian             | -14369.88        | 7191.48        | Gaussian        | -6247.16        | 3100.89        | Gaussian         | -1190.16        | 588.37        |
|                       | t-Student            | -15427.14        | 7914.14        | t-Student       | -6375.15        | 3087.85        | <b>t-Student</b> | <b>-1214.57</b> | <b>602.62</b> |
